# Supplementary material for: HILIC-ESI-FTMS with All Ion Fragmentation (AIF) Scans as a Tool for Fast Lipidome Investigations
Source: PubMed Central journal article supplement (PMC7287777; doi:10.3390/molecules25102310), 2020-05-14
Supplement: molecules-25-02310-s001.pdf [file molecules-25-02310-s001.pdf]

Supplementary material as noted in the text

## **HILIC-ESI-FTMS with all ion fragmentation (AIF) scans as a tool for fast lipidome investigation**

G. Ventura<sup>1</sup>, M. Bianco<sup>1</sup>, C. D. Calvano<sup>\*2,3</sup>, I. Losito<sup>1,2</sup> and T.R.I. Cataldi<sup>\*1,2</sup>

<sup>1</sup> Department of Chemistry, <sup>2</sup>SMART Inter-departmental Research Center, <sup>3</sup> Department of Pharmacy and Drug Sciences, University of Bari “Aldo Moro”, via Orabona 4, 70126, Bari, Italy

Number of Tables: 2

Number of Figures: 6

Supplemental Material: Yes

**Keywords:** Phospholipids, HILIC separation, tandem MS, fatty acids, AIF.

Authors for correspondence, e-mail: [cosimadamiana.calvano@uniba.it](mailto:cosimadamiana.calvano@uniba.it);  
[tommaso.cataldi@uniba.it](mailto:tommaso.cataldi@uniba.it)

## Lipid identification by HILIC-ESI-FTMS in positive and negative ion modes

Although high resolution/accuracy FTMS instruments provide useful information on plasma lipids, accurate  $m/z$  values may introduce misleading results because of the presence of isobaric PL species. Elution times of lipid classes during HILIC separation, along with a comparison between ionization in positive and negative ion mode, can be exploited for a more confident assignment. First, this approach was employed to process data generated from plasma samples which were extracted in triplicate and analyzed in both ESI modes. Peak areas were normalized with respect to the specific PL class and only values with a RSD<20% on replicate analyses were examined further [1]. PI, PE, PE-O, LPE and LPE-O attributions were first obtained in negative ion mode and then a targeted quest was performed in positive ion mode, searching for protonated adducts of PE and ammonia adducts of PI. Choline-head containing lipids (i.e., PC, SM and LPC) were investigated as demethylated species in negative ion mode and then a focused analysis was performed also in ESI(+) for their positive ions (note that in this case the neat positive charge is related to the choline head, due to protonation of the phosphate group). Only species assigned in both polarities were considered for data processing. In ESI(-), Hex<sub>1</sub>Cer ionizes mainly as deprotonated species while Hex<sub>2</sub>Cer and Hex<sub>3</sub>Cer ionize as chlorinated adducts. In positive ion mode, sodiated adducts contributed up to 25-30% to the peak signal (spectra not shown), while protonated adducts were the most abundant. Quehenberger *et al.* [2] reported the occurrence of PG, PS and PA in plasma samples; unfortunately, PS and PA did not provide a well definite chromatographic band and their intensity was relatively low, while only four PG passed the RSD criteria among replicates, i.e. PG 34:1, PG 36:1, PG 36:2, and PG 36:3. Since ions of these species were not retrieved in positive ion mode, they were not longer considered in the present work. We have recently reported the identification of neutral and acidic glycosphingolipids in human dermal

fibroblasts [3], evaluating the globosides (Gbl) levels. As already mentioned, extraction of ion current for  $m/z$  264.270 allowed the identification of ceramide-based classes (see **Figure 4**, plot B); peak signals with  $m/z$  values compatible with (Gbl) were retrieved at around 10 minutes. Interestingly, as noticed for human dermal fibroblasts [3], the main (Gbl) detected in plasma were globotetraosyl Gb4b 34:1;2 and Gb4b 42:2;2, detected at  $m/z$  1225.743 and  $m/z$  1335.852 as deprotonated species, and at  $m/z$  1261.719 and  $m/z$  1371.882 as chlorinated adducts, respectively. Nevertheless, signals in positive ion mode did not fit RSD criteria and were not further considered; **Table S1** summarizes all lipid species identified in plasma sample by the adopted approach.

- [1] W. B. Dunn *et al.*, "Procedures for large-scale metabolic profiling of serum and plasma using gas chromatography and liquid chromatography coupled to mass spectrometry," *Nat. Protoc.*, vol. 6, no. 7, pp. 1060–1083, Jul. 2011, doi: 10.1038/nprot.2011.335.
- [2] O. Quehenberger *et al.*, "Lipidomics reveals a remarkable diversity of lipids in human plasma1," *J. Lipid Res.*, vol. 51, no. 11, pp. 3299–3305, 2010, doi: 10.1194/jlr.M009449.
- [3] C. D. Calvano, G. Ventura, A. M. Sardanelli, I. Losito, F. Palmisano, and T. R. I. Cataldi, "Identification of neutral and acidic glycosphingolipids in the human dermal fibroblasts," *Anal. Biochem.*, vol. 581, no. April, p. 113348, 2019, doi: 10.1016/j.ab.2019.113348.

**Table S1.** Summary of glycosphingolipids and phospholipids identified in plasma sample of a healthy volunteer. Data are reported as class normalized intensities.

| Specie #                    | Sum composition | Formula                                         | Positive HRMS                                                                                       |                     | Negative HRMS                                                                                          |                     | Class-normalized relative abundance |
|-----------------------------|-----------------|-------------------------------------------------|-----------------------------------------------------------------------------------------------------|---------------------|--------------------------------------------------------------------------------------------------------|---------------------|-------------------------------------|
|                             |                 |                                                 | adduct                                                                                              | <i>m/z</i>          | adduct                                                                                                 | <i>m/z</i>          |                                     |
| <b>HexCer (1.8-2.5 min)</b> |                 |                                                 |                                                                                                     |                     |                                                                                                        |                     |                                     |
| 1                           | 32:1;2          | C <sub>38</sub> H <sub>73</sub> NO <sub>8</sub> | [HexCer+H] <sup>+</sup><br>[HexCer+Na] <sup>+</sup><br><br>Intensity ratio:<br>between 1 and<br>0.4 | 672.541,<br>694.523 | [HexCer-H] <sup>-</sup><br>[HexCer+Cl] <sup>-</sup><br><br>Intensity<br>ratio:<br>between 1<br>and 0.5 | 670.526,<br>706.503 | 0.54 ± 0.05                         |
| 2                           | 33:1;2          | C <sub>39</sub> H <sub>75</sub> NO <sub>8</sub> |                                                                                                     | 686.557,<br>708.538 |                                                                                                        | 684.542,<br>720.519 | 0.44 ± 0.02                         |
| 3                           | 34:1;2          | C <sub>40</sub> H <sub>77</sub> NO <sub>8</sub> |                                                                                                     | 700.572,<br>722.554 |                                                                                                        | 698.558,<br>734.534 | 18.7 ± 1.2                          |
| 4                           | 34:2;2          | C <sub>40</sub> H <sub>75</sub> NO <sub>8</sub> |                                                                                                     | 698.557,<br>720.538 |                                                                                                        | 696.542,<br>732.519 | 0.63 ± 0.03                         |
| 5                           | 36:1;2          | C <sub>42</sub> H <sub>88</sub> NO <sub>8</sub> |                                                                                                     | 728.603,<br>750.585 |                                                                                                        | 726.589,<br>762.566 | 1.65 ± 0.04                         |
| 6                           | 36:2;2          | C <sub>42</sub> H <sub>79</sub> NO <sub>8</sub> |                                                                                                     | 726.588,<br>748.570 |                                                                                                        | 724.573,<br>760.550 | 0.28 ± 0.02                         |
| 7                           | 38:1;2          | C <sub>44</sub> H <sub>85</sub> NO <sub>8</sub> |                                                                                                     | 756.635,<br>778.617 |                                                                                                        | 754.620,<br>790.597 | 2.3 ± 0.1                           |
| 8                           | 38:2;2          | C <sub>44</sub> H <sub>83</sub> NO <sub>8</sub> |                                                                                                     | 754.619,<br>770.650 |                                                                                                        | 752.605,<br>788.581 | 0.27 ± 0.02                         |
| 9                           | 39:1;2          | C <sub>45</sub> H <sub>87</sub> NO <sub>8</sub> |                                                                                                     | 770.650,<br>792.632 |                                                                                                        | 768.636,<br>804.613 | 1.05 ± 0.03                         |
| 10                          | 40:1;2          | C <sub>46</sub> H <sub>89</sub> NO <sub>8</sub> |                                                                                                     | 784.666,<br>806.648 |                                                                                                        | 782.652,<br>818.628 | 17.1 ± 0.4                          |
| 11                          | 40:2;2          | C <sub>46</sub> H <sub>87</sub> NO <sub>8</sub> |                                                                                                     | 782.650,<br>804.632 |                                                                                                        | 780.636,<br>816.613 | 2.8 ± 0.1                           |
| 12                          | 41:1;2          | C <sub>47</sub> H <sub>91</sub> NO <sub>8</sub> |                                                                                                     | 798.682,<br>820.664 |                                                                                                        | 796.667,<br>832.644 | 9.0 ± 0.4                           |
| 13                          | 41:2;2          | C <sub>47</sub> H <sub>89</sub> NO <sub>8</sub> |                                                                                                     | 796.666,<br>818.648 |                                                                                                        | 794.652,<br>830.628 | 1.85 ± 0.05                         |
| 14                          | 42:1;2          | C <sub>48</sub> H <sub>93</sub> NO <sub>8</sub> |                                                                                                     | 812.697,<br>834.679 |                                                                                                        | 810.683,<br>846.660 | 21.3 ± 0.4                          |

Running title: All ion fragmentation as a tool for fast lipidome investigation

|    |        |                                                 |                     |  |                     |             |
|----|--------|-------------------------------------------------|---------------------|--|---------------------|-------------|
| 15 | 42:2;2 | C <sub>48</sub> H <sub>91</sub> NO <sub>8</sub> | 810.682,<br>832.664 |  | 808.667,<br>844.644 | 20.7 ± 0.3  |
| 16 | 43:1;2 | C <sub>49</sub> H <sub>95</sub> NO <sub>8</sub> | 826.713,<br>848.695 |  | 824.698,<br>860.675 | 0.8 ± 0.04  |
| 17 | 43:2;2 | C <sub>49</sub> H <sub>93</sub> NO <sub>8</sub> | 824.697,<br>846.679 |  | 822.683,<br>858.660 | 0.47 ± 0.02 |

Hex2Cer (4.5-6.5 min)

| Specie # | Sum composition | Formula                                           | Positive HRMS                                        |                     | Negative HRMS                               |                      |             |
|----------|-----------------|---------------------------------------------------|------------------------------------------------------|---------------------|---------------------------------------------|----------------------|-------------|
|          |                 |                                                   | adduct                                               | m/z                 | adduct                                      | m/z                  |             |
| 18       | 32:1;2          | C <sub>44</sub> H <sub>84</sub> NO <sub>13</sub>  |                                                      | 834.594,<br>856.576 |                                             | 868.556,<br>832.579  | 4.4 ± 0.5   |
| 19       | 33:1;2          | C <sub>44</sub> H <sub>84</sub> NO <sub>13</sub>  |                                                      | 848.609,<br>870.591 |                                             | 882.571,<br>846.595  | 1.22 ± 0.05 |
| 20       | 34:1;2          | C <sub>45</sub> H <sub>85</sub> NO <sub>13</sub>  |                                                      | 862.625,<br>884.607 |                                             | 896.587,<br>860.610  | 62.5 ± 0.2  |
| 21       | 34:2;2          | C <sub>46</sub> H <sub>85</sub> NO <sub>13</sub>  |                                                      | 860.609,<br>882.591 |                                             | 894.571,<br>858.595  | 5.21 ± 0.12 |
| 22       | 36:1;2          | C <sub>48</sub> H <sub>91</sub> NO <sub>13</sub>  |                                                      | 890.656,<br>912.638 |                                             | 924.618,<br>888.642  | 2.4 ± 0.3   |
| 23       | 38:1;2          | C <sub>50</sub> H <sub>95</sub> NO <sub>13</sub>  |                                                      | 918.688,<br>940.67  |                                             | 952.65,<br>916.673   | 0.66 ± 0.04 |
| 24       | 40:1;2          | C <sub>52</sub> H <sub>99</sub> NO <sub>13</sub>  | Hex2Cer+H] <sup>+</sup><br>[Hex2Cer+Na] <sup>+</sup> | 946.719,<br>968.701 | [Hex2Cer + Cl] <sup>-</sup>                 | 980.681,<br>944.704  | 2.51 ± 0.02 |
| 25       | 40:2;2          | C <sub>52</sub> H <sub>97</sub> NO <sub>13</sub>  |                                                      | 944.703,<br>966.685 | [Hex2Cer-H] <sup>-</sup>                    | 978.665,<br>942.689  | 1.82 ± 0.1  |
| 26       | 41:1;2          | C <sub>53</sub> H <sub>101</sub> NO <sub>13</sub> | Intensity ratio:<br>between 1 and<br>0.3             | 960.735,<br>982.717 | Intensity<br>ratio:<br>between 1<br>and 0.3 | 994.697,<br>958.72   | 0.78 ± 0.04 |
| 27       | 41:2;2          | C <sub>43</sub> H <sub>99</sub> NO <sub>13</sub>  |                                                      | 958.719,<br>980.701 |                                             | 992.681,<br>956.704  | 0.48 ± 0.01 |
| 28       | 42:1;2          | C <sub>54</sub> H <sub>103</sub> NO <sub>13</sub> |                                                      | 974.75,<br>996.732  |                                             | 1008.712,<br>972.736 | 3.02 ± 0.12 |
| 29       | 42:2;2          | C <sub>54</sub> H <sub>101</sub> NO <sub>13</sub> |                                                      | 972.735,<br>994.717 |                                             | 1006.697,<br>970.72  | 15.1 ± 0.4  |

Hex3Cer (8.5-9.5 min)

|    |        |                                                  |                                                      |                     |                                                        |                      |             |
|----|--------|--------------------------------------------------|------------------------------------------------------|---------------------|--------------------------------------------------------|----------------------|-------------|
| 30 | 32:1;2 | C <sub>44</sub> H <sub>84</sub> NO <sub>13</sub> | Hex3Cer+H] <sup>+</sup><br>[Hex3Cer+Na] <sup>+</sup> | 848.609,<br>870.591 | Hex3Cer + Cl] <sup>-</sup><br>[Hex3Cer-H] <sup>-</sup> | 1030.609,<br>994.632 | 1.90 ± 0.11 |
|----|--------|--------------------------------------------------|------------------------------------------------------|---------------------|--------------------------------------------------------|----------------------|-------------|

Running title: All ion fragmentation as a tool for fast lipidome investigation

|    |        |                                                  |                                          |                     |                                             |                       |             |
|----|--------|--------------------------------------------------|------------------------------------------|---------------------|---------------------------------------------|-----------------------|-------------|
| 31 | 34:0;2 | C <sub>44</sub> H <sub>84</sub> NO <sub>13</sub> | Intensity ratio:<br>between 1 and<br>0.3 | 848.609,<br>870.591 | Intensity<br>ratio:<br>between 1<br>and 0.3 | 1060.656,<br>1024.679 | 6.3 ± 0.2   |
| 32 | 34:1;2 | C <sub>44</sub> H <sub>84</sub> NO <sub>13</sub> |                                          | 848.609,<br>870.591 |                                             | 1058.64,<br>1022.663  | 37.1 ± 0.2  |
| 33 | 34:2;2 | C <sub>44</sub> H <sub>84</sub> NO <sub>13</sub> |                                          | 848.609,<br>870.591 |                                             | 1056.624,<br>1020.648 | 3.7 ± 0.2   |
| 34 | 36:1;2 | C <sub>44</sub> H <sub>84</sub> NO <sub>13</sub> |                                          | 848.609,<br>870.591 |                                             | 1086.671,<br>1050.695 | 5.58 ± 0.17 |
| 35 | 36:2;2 | C <sub>44</sub> H <sub>84</sub> NO <sub>13</sub> |                                          | 848.609,<br>870.591 |                                             | 1084.656,<br>1048.679 | 1.86 ± 0.10 |
| 36 | 38:1;2 | C <sub>44</sub> H <sub>84</sub> NO <sub>13</sub> |                                          | 848.609,<br>870.591 |                                             | 1114.703,<br>1078.726 | 2.67 ± 0.13 |
| 37 | 38:2;2 | C <sub>44</sub> H <sub>84</sub> NO <sub>13</sub> |                                          | 848.609,<br>870.591 |                                             | 1112.687,<br>1076.71  | 1.13 ± 0.07 |
| 38 | 40:1;2 | C <sub>44</sub> H <sub>84</sub> NO <sub>13</sub> |                                          | 848.609,<br>870.591 |                                             | 1144.75,<br>1108.773  | 8.0 ± 0.4   |
| 39 | 40:2;2 | C <sub>44</sub> H <sub>84</sub> NO <sub>13</sub> |                                          | 848.609,<br>870.591 |                                             | 1142.734,<br>1106.757 | 6.3 ± 0.4   |
| 40 | 42:0;2 | C <sub>44</sub> H <sub>84</sub> NO <sub>13</sub> |                                          | 848.609,<br>870.591 |                                             | 1140.718,<br>1104.742 | 1.17 ± 0.05 |
| 41 | 42:1;2 | C <sub>44</sub> H <sub>84</sub> NO <sub>13</sub> |                                          | 848.609,<br>870.591 |                                             | 1172.781,<br>1136.804 | 7.9 ± 0.3   |
| 42 | 42:2;2 | C <sub>44</sub> H <sub>84</sub> NO <sub>13</sub> |                                          | 848.609,<br>870.591 |                                             | 1170.765,<br>1134.788 | 16.6 ± 0.7  |

PI (7.5 – 9.0 min)

|    |      |                                                   |                                               |                                                                                                                                                                                  |                     |         |             |            |
|----|------|---------------------------------------------------|-----------------------------------------------|----------------------------------------------------------------------------------------------------------------------------------------------------------------------------------|---------------------|---------|-------------|------------|
| 43 | 32:1 | C <sub>41</sub> H <sub>77</sub> O <sub>13</sub> P | [PI+NH <sub>4</sub> ] <sup>+</sup>            | 826.544                                                                                                                                                                          | [PI-H] <sup>-</sup> | 807.503 | 2.2 ± 0.2   |            |
| 44 | 33:1 | C <sub>42</sub> H <sub>79</sub> O <sub>13</sub> P | [PI+H] <sup>+</sup>                           | 840.56                                                                                                                                                                           |                     | 821.519 | 0.1 ± 0.01  |            |
| 45 | 34:1 | C <sub>43</sub> H <sub>81</sub> O <sub>13</sub> P | [PI+Na] <sup>+</sup>                          | 854.575                                                                                                                                                                          |                     | 835.534 | 9.9 ± 0.9   |            |
| 46 | 34:2 | C <sub>43</sub> H <sub>77</sub> O <sub>13</sub> P | Intensity ratio:<br>between 1, 0.3<br>and 0.2 | 852.56                                                                                                                                                                           |                     | 833.519 | 3.2 ± 0.2   |            |
| 47 | 36:0 | C <sub>45</sub> H <sub>87</sub> O <sub>13</sub> P |                                               | 884.622                                                                                                                                                                          |                     | 865.581 | 0.60 ± 0.11 |            |
| 48 | 36:1 | C <sub>45</sub> H <sub>85</sub> O <sub>13</sub> P |                                               | 882.607                                                                                                                                                                          |                     | 863.566 | 9.0 ± 0.3   |            |
| 49 | 36:2 | C <sub>45</sub> H <sub>83</sub> O <sub>13</sub> P |                                               | 880.591                                                                                                                                                                          |                     | 861.550 | 15.0 ± 0.4  |            |
| 50 | 36:3 | C <sub>45</sub> H <sub>81</sub> O <sub>13</sub> P |                                               | 878.575                                                                                                                                                                          |                     | 859.534 | 2.9 ± 0.3   |            |
| 51 | 36:4 | C <sub>45</sub> H <sub>79</sub> O <sub>13</sub> P |                                               | 876.56                                                                                                                                                                           |                     | 857.519 | 4.4 ± 0.2   |            |
| 52 | 38:3 | C <sub>47</sub> H <sub>85</sub> O <sub>13</sub> P |                                               | Sodiated and<br>protonated adducts<br>give rise to quasi-<br>isobaric species (i.e.<br>887.562 ± 0.003 may<br>be<br>[PI 36:1 +Na] <sup>+</sup> or<br>[PI 38:4 +H] <sup>+</sup> ; |                     | 906.607 | 887.566     | 8.6 ± 0.3  |
| 53 | 38:4 | C <sub>47</sub> H <sub>83</sub> O <sub>13</sub> P |                                               |                                                                                                                                                                                  |                     | 904.591 | 885.550     | 39.3 ± 0.4 |
| 54 | 38:5 | C <sub>47</sub> H <sub>81</sub> O <sub>13</sub> P |                                               |                                                                                                                                                                                  |                     | 902.575 | 883.534     | 1.7 ± 0.2  |
| 55 | 38:6 | C <sub>47</sub> H <sub>79</sub> O <sub>13</sub> P |                                               |                                                                                                                                                                                  | 900.56              | 881.519 | 0.49 ± 0.01 |            |
| 56 | 40:5 | C <sub>49</sub> H <sub>85</sub> O <sub>13</sub> P |                                               |                                                                                                                                                                                  | 930.607             | 911.566 | 0.58 ± 0.04 |            |

Running title: All ion fragmentation as a tool for fast lipidome investigation

|                              |       |                                                   |                                                                                                                                                                                              |         |                         |         |             |
|------------------------------|-------|---------------------------------------------------|----------------------------------------------------------------------------------------------------------------------------------------------------------------------------------------------|---------|-------------------------|---------|-------------|
| 57                           | 40:6  | C <sub>49</sub> H <sub>83</sub> O <sub>13</sub> P | So, those adducts were not considered.                                                                                                                                                       | 928.591 |                         | 909.550 | 2.05 ± 0.07 |
| <b>PE (9.5 – 10.5 min)</b>   |       |                                                   |                                                                                                                                                                                              |         |                         |         |             |
| 58                           | 34:0  | C <sub>39</sub> H <sub>77</sub> NO <sub>8</sub> P | <p>[PE+H]<sup>+</sup><br/>[PE+Na]<sup>+</sup></p> <p>Intensity ratio:<br/>between 1 and<br/>0.2</p> <p>Sodiated and<br/>protonated adducts<br/>give rise to quasi-<br/>isobaric species.</p> | 720.554 | [PE-H] <sup>-</sup>     | 718.539 | 0.19 ± 0.01 |
| 59                           | 34:1  | C <sub>39</sub> H <sub>76</sub> NO <sub>8</sub> P |                                                                                                                                                                                              | 718.538 |                         | 716.524 | 3.15 ± 0.10 |
| 60                           | 34:2  | C <sub>39</sub> H <sub>74</sub> NO <sub>8</sub> P |                                                                                                                                                                                              | 716.522 |                         | 714.508 | 3.9 ± 0.2   |
| 61                           | 34:3  | C <sub>39</sub> H <sub>72</sub> NO <sub>8</sub> P |                                                                                                                                                                                              | 714.507 |                         | 712.492 | 0.11 ± 0.02 |
| 62                           | 35:1  | C <sub>40</sub> H <sub>80</sub> NO <sub>8</sub> P |                                                                                                                                                                                              | 732.554 |                         | 730.539 | 0.18 ± 0.01 |
| 63                           | 36:0  | C <sub>41</sub> H <sub>82</sub> NO <sub>8</sub> P |                                                                                                                                                                                              | 748.585 |                         | 746.571 | 0.22 ± 0.01 |
| 64                           | 36:1  | C <sub>41</sub> H <sub>80</sub> NO <sub>8</sub> P |                                                                                                                                                                                              | 746.569 |                         | 744.555 | 3.23 ± 0.03 |
| 65                           | 36:2  | C <sub>41</sub> H <sub>78</sub> NO <sub>8</sub> P |                                                                                                                                                                                              | 744.554 |                         | 742.539 | 17.2 ± 0.2  |
| 66                           | 36:3  | C <sub>41</sub> H <sub>76</sub> NO <sub>8</sub> P |                                                                                                                                                                                              | 742.538 |                         | 740.524 | 4.32 ± 0.08 |
| 67                           | 36:4  | C <sub>41</sub> H <sub>74</sub> NO <sub>8</sub> P |                                                                                                                                                                                              | 740.522 |                         | 738.508 | 8.6 ± 0.2   |
| 68                           | 36:5  | C <sub>41</sub> H <sub>72</sub> NO <sub>8</sub> P |                                                                                                                                                                                              | 738.507 |                         | 736.492 | 0.34 ± 0.02 |
| 69                           | 37:2  | C <sub>42</sub> H <sub>80</sub> NO <sub>8</sub> P |                                                                                                                                                                                              | 758.569 |                         | 756.555 | 0.12 ± 0.01 |
| 70                           | 37:4  | C <sub>42</sub> H <sub>76</sub> NO <sub>8</sub> P |                                                                                                                                                                                              | 754.538 |                         | 752.524 | 0.47 ± 0.01 |
| 71                           | 38:1  | C <sub>42</sub> H <sub>77</sub> NO <sub>8</sub> P |                                                                                                                                                                                              | 774.601 |                         | 772.586 | 0.14 ± 0    |
| 72                           | 38:2  | C <sub>43</sub> H <sub>82</sub> NO <sub>8</sub> P |                                                                                                                                                                                              | 772.585 |                         | 770.571 | 0.13 ± 0.01 |
| 73                           | 38:3  | C <sub>43</sub> H <sub>80</sub> NO <sub>8</sub> P |                                                                                                                                                                                              | 770.569 |                         | 768.555 | 2.29 ± 0.03 |
| 74                           | 38:4  | C <sub>43</sub> H <sub>78</sub> NO <sub>8</sub> P |                                                                                                                                                                                              | 768.554 |                         | 766.539 | 24.8 ± 0.2  |
| 75                           | 38:5  | C <sub>43</sub> H <sub>76</sub> NO <sub>8</sub> P |                                                                                                                                                                                              | 766.538 |                         | 764.524 | 6.00 ± 0.08 |
| 76                           | 38:6  | C <sub>43</sub> H <sub>74</sub> NO <sub>8</sub> P |                                                                                                                                                                                              | 764.522 |                         | 762.508 | 12.9 ± 0.5  |
| 77                           | 38:7  | C <sub>43</sub> H <sub>72</sub> NO <sub>8</sub> P |                                                                                                                                                                                              | 762.507 |                         | 760.492 | 0.18 ± 0.02 |
| 78                           | 39:4  | C <sub>44</sub> H <sub>80</sub> NO <sub>8</sub> P |                                                                                                                                                                                              | 782.569 |                         | 780.555 | 0.14 ± 0.01 |
| 79                           | 39:6  | C <sub>44</sub> H <sub>76</sub> NO <sub>8</sub> P |                                                                                                                                                                                              | 778.538 |                         | 776.524 | 0.30 ± 0.01 |
| 80                           | 40:3  | C <sub>45</sub> H <sub>84</sub> NO <sub>8</sub> P |                                                                                                                                                                                              | 798.601 |                         | 796.586 | 0.18 ± 0.03 |
| 81                           | 40:4  | C <sub>45</sub> H <sub>82</sub> NO <sub>8</sub> P |                                                                                                                                                                                              | 796.585 |                         | 794.571 | 0.52 ± 0.03 |
| 82                           | 40:5  | C <sub>45</sub> H <sub>80</sub> NO <sub>8</sub> P |                                                                                                                                                                                              | 794.569 |                         | 792.555 | 1.03 ± 0.04 |
| 83                           | 40:6  | C <sub>45</sub> H <sub>78</sub> NO <sub>8</sub> P |                                                                                                                                                                                              | 792.554 |                         | 790.539 | 6.19 ± 0.12 |
| 84                           | 40:7  | C <sub>45</sub> H <sub>76</sub> NO <sub>8</sub> P |                                                                                                                                                                                              | 790.538 |                         | 788.524 | 1.16 ± 0.02 |
| 85                           | 40:9  | C <sub>45</sub> H <sub>72</sub> NO <sub>8</sub> P |                                                                                                                                                                                              | 786.507 |                         | 784.492 | 0.37 ± 0.03 |
| 86                           | 42:10 | C <sub>47</sub> H <sub>74</sub> NO <sub>8</sub> P | 812.522                                                                                                                                                                                      | 810.508 | 0.31 ± 0.03             |         |             |
| 87                           | 42:11 | C <sub>47</sub> H <sub>72</sub> NO <sub>8</sub> P | 810.507                                                                                                                                                                                      | 808.492 | 0.74 ± 0.03             |         |             |
| 88                           | 42:12 | C <sub>47</sub> H <sub>70</sub> NO <sub>8</sub> P | 808.491                                                                                                                                                                                      | 806.477 | 0.46 ± 0.02             |         |             |
| <b>PE-O (9.5 – 10.5 min)</b> |       |                                                   |                                                                                                                                                                                              |         |                         |         |             |
| 89                           | 34:1  | C <sub>39</sub> H <sub>77</sub> NO <sub>7</sub> P | [PE-O +H] <sup>+</sup>                                                                                                                                                                       | 704.559 | [PE-O - H] <sup>-</sup> | 702.544 | 0.36 ± 0.02 |
| 90                           | 34:2  | C <sub>39</sub> H <sub>76</sub> NO <sub>7</sub> P |                                                                                                                                                                                              | 702.543 |                         | 700.529 | 1.84 ± 0.08 |

Running title: All ion fragmentation as a tool for fast lipidome investigation

|     |      |                                                   |                                                                                |         |             |             |
|-----|------|---------------------------------------------------|--------------------------------------------------------------------------------|---------|-------------|-------------|
| 91  | 34:3 | C <sub>39</sub> H <sub>74</sub> NO <sub>7</sub> P | [PE-O +Na] <sup>+</sup>                                                        | 700.528 | 698.513     | 3.54 ± 0.07 |
| 92  | 35:3 | C <sub>40</sub> H <sub>76</sub> NO <sub>7</sub> P |                                                                                | 714.543 | 712.529     | 0.28 ± 0.01 |
| 93  | 36:1 | C <sub>41</sub> H <sub>82</sub> NO <sub>7</sub> P | Intensity ratio:<br>between 1 and<br>0.2                                       | 732.59  | 730.576     | 0.12 ± 0.02 |
| 94  | 36:2 | C <sub>41</sub> H <sub>80</sub> NO <sub>7</sub> P |                                                                                | 730.575 | 728.56      | 1.69 ± 0.04 |
| 95  | 36:3 | C <sub>41</sub> H <sub>78</sub> NO <sub>7</sub> P | Sodiated and<br>protonated adducts<br>give rise to quasi-<br>isobaric species. | 728.559 | 726.544     | 7.95 ± 0.16 |
| 96  | 36:4 | C <sub>41</sub> H <sub>76</sub> NO <sub>7</sub> P |                                                                                | 726.543 | 724.529     | 3.7 ± 0.2   |
| 97  | 36:5 | C <sub>41</sub> H <sub>74</sub> NO <sub>7</sub> P |                                                                                | 724.528 | 722.513     | 9.2 ± 0.5   |
| 98  | 36:6 | C <sub>41</sub> H <sub>72</sub> NO <sub>7</sub> P |                                                                                | 722.512 | 720.497     | 0.39 ± 0.05 |
| 99  | 37:5 | C <sub>42</sub> H <sub>76</sub> NO <sub>7</sub> P |                                                                                | 738.543 | 736.529     | 0.79 ± 0.01 |
| 100 | 37:6 | C <sub>42</sub> H <sub>74</sub> NO <sub>7</sub> P |                                                                                | 736.528 | 734.513     | 0.14 ± 0.03 |
| 101 | 38:2 | C <sub>43</sub> H <sub>84</sub> NO <sub>7</sub> P |                                                                                | 758.606 | 756.591     | 0.21 ± 0.01 |
| 102 | 38:3 | C <sub>43</sub> H <sub>82</sub> NO <sub>7</sub> P |                                                                                | 756.59  | 754.576     | 0.61 ± 0.01 |
| 103 | 38:4 | C <sub>43</sub> H <sub>80</sub> NO <sub>7</sub> P |                                                                                | 754.575 | 752.56      | 2.48 ± 0.07 |
| 104 | 38:5 | C <sub>43</sub> H <sub>78</sub> NO <sub>7</sub> P |                                                                                | 752.559 | 750.544     | 23.1 ± 0.7  |
| 105 | 38:6 | C <sub>43</sub> H <sub>76</sub> NO <sub>7</sub> P | 750.543                                                                        | 748.529 | 14.9 ± 0.4  |             |
| 106 | 38:7 | C <sub>43</sub> H <sub>74</sub> NO <sub>7</sub> P | 748.528                                                                        | 746.513 | 6.25 ± 0.16 |             |
| 107 | 39:5 | C <sub>44</sub> H <sub>80</sub> NO <sub>7</sub> P | 766.575                                                                        | 764.56  | 0.20 ± 0.01 |             |
| 108 | 39:6 | C <sub>44</sub> H <sub>78</sub> NO <sub>7</sub> P | 764.559                                                                        | 762.544 | 0.28 ± 0.01 |             |
| 109 | 39:7 | C <sub>44</sub> H <sub>76</sub> NO <sub>7</sub> P | 762.543                                                                        | 760.529 | 0.51 ± 0.03 |             |
| 110 | 40:3 | C <sub>45</sub> H <sub>86</sub> NO <sub>7</sub> P | 784.621                                                                        | 782.607 | 0.17 ± 0.02 |             |
| 111 | 40:4 | C <sub>45</sub> H <sub>84</sub> NO <sub>7</sub> P | 782.606                                                                        | 780.591 | 0.32 ± 0.01 |             |
| 112 | 40:5 | C <sub>45</sub> H <sub>82</sub> NO <sub>7</sub> P | 780.59                                                                         | 778.576 | 2.06 ± 0.04 |             |
| 113 | 40:6 | C <sub>45</sub> H <sub>80</sub> NO <sub>7</sub> P | 778.575                                                                        | 776.56  | 2.93 ± 0.08 |             |
| 114 | 40:7 | C <sub>45</sub> H <sub>78</sub> NO <sub>7</sub> P | 776.559                                                                        | 774.544 | 10.1 ± 0.2  |             |
| 115 | 40:8 | C <sub>45</sub> H <sub>76</sub> NO <sub>7</sub> P | 774.543                                                                        | 772.529 | 4.41 ± 0.08 |             |
| 116 | 42:5 | C <sub>47</sub> H <sub>86</sub> NO <sub>7</sub> P | 808.621                                                                        | 806.607 | 0.29 ± 0.01 |             |
| 117 | 42:6 | C <sub>47</sub> H <sub>84</sub> NO <sub>7</sub> P | 806.606                                                                        | 804.591 | 0.37 ± 0    |             |
| 118 | 42:7 | C <sub>47</sub> H <sub>82</sub> NO <sub>7</sub> P | 804.59                                                                         | 802.576 | 0.66 ± 0.04 |             |
| 119 | 42:8 | C <sub>47</sub> H <sub>80</sub> NO <sub>7</sub> P | 802.575                                                                        | 800.560 | 0.25 ± 0.01 |             |

LPE (11.0 – 12.5 min)

|     |      |                                                   |                      |         |                      |         |             |
|-----|------|---------------------------------------------------|----------------------|---------|----------------------|---------|-------------|
| 120 | 16:0 | C <sub>21</sub> H <sub>43</sub> NO <sub>7</sub> P | [LPE+H] <sup>+</sup> | 454.293 | [LPE-H] <sup>-</sup> | 452.278 | 5.59 ± 0.18 |
| 121 | 16:1 | C <sub>21</sub> H <sub>42</sub> NO <sub>7</sub> P |                      | 452.277 |                      | 450.263 | 0.23 ± 0.01 |
| 122 | 17:0 | C <sub>22</sub> H <sub>46</sub> NO <sub>7</sub> P |                      | 468.308 |                      | 466.294 | 0.32 ± 0.02 |
| 123 | 18:0 | C <sub>23</sub> H <sub>48</sub> NO <sub>7</sub> P |                      | 482.324 |                      | 480.31  | 16.3 ± 0.9  |
| 124 | 18:1 | C <sub>23</sub> H <sub>46</sub> NO <sub>7</sub> P |                      | 480.308 |                      | 478.294 | 14.7 ± 0.3  |
| 125 | 18:2 | C <sub>23</sub> H <sub>44</sub> NO <sub>7</sub> P |                      | 478.293 |                      | 476.278 | 15.3 ± 0.3  |
| 126 | 18:3 | C <sub>23</sub> H <sub>42</sub> NO <sub>7</sub> P |                      | 476.277 |                      | 474.263 | 0.23 ± 0.02 |
| 127 | 20:2 | C <sub>25</sub> H <sub>48</sub> NO <sub>7</sub> P |                      | 506.324 |                      | 504.31  | 0.54 ± 0.02 |



Running title: All ion fragmentation as a tool for fast lipidome investigation

|            |      |                                                   |         |  |         |             |
|------------|------|---------------------------------------------------|---------|--|---------|-------------|
| <b>128</b> | 20:3 | C <sub>25</sub> H <sub>46</sub> NO <sub>7</sub> P | 504.308 |  | 502.294 | 3.16 ± 0.07 |
| <b>129</b> | 20:4 | C <sub>25</sub> H <sub>44</sub> NO <sub>7</sub> P | 500.293 |  | 500.278 | 21.8 ± 0.9  |
| <b>130</b> | 20:5 | C <sub>25</sub> H <sub>42</sub> NO <sub>7</sub> P | 500.277 |  | 498.263 | 0.76 ± 0.05 |
| <b>131</b> | 22:0 | C <sub>27</sub> H <sub>56</sub> NO <sub>7</sub> P | 538.387 |  | 536.372 | 0.24 ± 0.01 |
| <b>132</b> | 22:2 | C <sub>27</sub> H <sub>52</sub> NO <sub>7</sub> P | 534.355 |  | 532.341 | 0.35 ± 0.01 |
| <b>133</b> | 22:4 | C <sub>27</sub> H <sub>48</sub> NO <sub>7</sub> P | 530.324 |  | 528.31  | 0.75 ± 0.06 |
| <b>134</b> | 22:5 | C <sub>27</sub> H <sub>46</sub> NO <sub>7</sub> P | 528.308 |  | 526.294 | 2.66 ± 0.06 |
| <b>135</b> | 22:6 | C <sub>27</sub> H <sub>44</sub> NO <sub>7</sub> P | 526.293 |  | 524.278 | 16.6 ± 0.2  |
| <b>136</b> | 24:0 | C <sub>29</sub> H <sub>60</sub> NO <sub>7</sub> P | 566.418 |  | 564.403 | 0.45 ± 0.03 |

LPE-O (11.0 – 12.5 min)

|            |      |                                                   |         |                         |         |             |
|------------|------|---------------------------------------------------|---------|-------------------------|---------|-------------|
| <b>137</b> | 16:1 | C <sub>21</sub> H <sub>44</sub> NO <sub>6</sub> P | 438.298 |                         | 436.283 | 22.3 ± 0.7  |
| <b>138</b> | 17:1 | C <sub>22</sub> H <sub>46</sub> NO <sub>6</sub> P | 452.314 |                         | 450.299 | 2.82 ± 0.15 |
| <b>139</b> | 18:1 | C <sub>23</sub> H <sub>48</sub> NO <sub>6</sub> P | 466.329 |                         | 464.315 | 38.9 ± 0.9  |
| <b>140</b> | 18:2 | C <sub>23</sub> H <sub>46</sub> NO <sub>6</sub> P | 464.314 |                         | 462.299 | 13.3 ± 0.4  |
| <b>141</b> | 18:3 | C <sub>23</sub> H <sub>44</sub> NO <sub>6</sub> P | 462.298 |                         | 460.283 | 0.38 ± 0.03 |
| <b>142</b> | 19:1 | C <sub>24</sub> H <sub>50</sub> NO <sub>6</sub> P | 480.345 |                         | 478.330 | 0.37 ± 0.01 |
| <b>143</b> | 20:0 | C <sub>25</sub> H <sub>54</sub> NO <sub>6</sub> P | 496.376 |                         | 494.362 | 0.36 ± 0.01 |
| <b>144</b> | 20:1 | C <sub>25</sub> H <sub>52</sub> NO <sub>6</sub> P | 494.361 | [LPE-O +H] <sup>+</sup> | 492.346 | 4.4 ± 0.2   |
| <b>145</b> | 20:2 | C <sub>25</sub> H <sub>50</sub> NO <sub>6</sub> P | 492.345 |                         | 490.330 | 0.77 ± 0.06 |
| <b>146</b> | 22:0 | C <sub>27</sub> H <sub>58</sub> NO <sub>6</sub> P | 524.407 |                         | 522.393 | 0.90 ± 0.04 |
| <b>147</b> | 22:1 | C <sub>27</sub> H <sub>56</sub> NO <sub>6</sub> P | 522.392 |                         | 520.377 | 2.91 ± 0.14 |
| <b>148</b> | 22:2 | C <sub>27</sub> H <sub>54</sub> NO <sub>6</sub> P | 520.376 |                         | 518.362 | 0.75 ± 0.09 |
| <b>149</b> | 24:0 | C <sub>29</sub> H <sub>62</sub> NO <sub>6</sub> P | 552.439 |                         | 550.424 | 2.82 ± 0.14 |
| <b>150</b> | 24:1 | C <sub>29</sub> H <sub>60</sub> NO <sub>6</sub> P | 550.423 |                         | 548.409 | 4.07 ± 0.03 |
| <b>151</b> | 24:2 | C <sub>21</sub> H <sub>44</sub> NO <sub>6</sub> P | 548.407 |                         | 546.393 | 4.35 ± 0.06 |
| <b>152</b> | 26:2 | C <sub>21</sub> H <sub>44</sub> NO <sub>6</sub> P | 576.439 |                         | 574.424 | 0.59 ± 0.03 |

PC (14.5 – 16.0 min)

|            |      |                                                   |         |                      |                     |             |
|------------|------|---------------------------------------------------|---------|----------------------|---------------------|-------------|
| <b>153</b> | 30:0 | C <sub>38</sub> H <sub>76</sub> NO <sub>8</sub> P | 706.538 |                      | 690.508,<br>750.529 | 0.56 ± 0.02 |
| <b>154</b> | 32:0 | C <sub>40</sub> H <sub>80</sub> NO <sub>8</sub> P | 734.569 |                      | 718.539,<br>778.56  | 1.86 ± 0.05 |
| <b>155</b> | 32:1 | C <sub>40</sub> H <sub>78</sub> NO <sub>8</sub> P | 732.554 | [PC +H] <sup>+</sup> | 716.524,<br>776.545 | 1.29 ± 0.03 |
| <b>156</b> | 32:2 | C <sub>40</sub> H <sub>76</sub> NO <sub>8</sub> P | 730.538 |                      | 714.508,<br>774.529 | 0.31 ± 0.02 |
| <b>157</b> | 33:1 | C <sub>41</sub> H <sub>80</sub> NO <sub>8</sub> P | 746.569 |                      | 730.539,<br>790.56  | 0.25 ± 0.01 |

Running title: All ion fragmentation as a tool for fast lipidome investigation

|     |      |                                                   |         |                     |             |
|-----|------|---------------------------------------------------|---------|---------------------|-------------|
| 158 | 33:2 | C <sub>41</sub> H <sub>78</sub> NO <sub>8</sub> P | 744.554 | 728.524,<br>788.545 | 0.19 ± 0.01 |
| 159 | 34:1 | C <sub>42</sub> H <sub>82</sub> NO <sub>8</sub> P | 760.585 | 744.555,<br>804.576 | 14.6 ± 0.2  |
| 160 | 34:2 | C <sub>42</sub> H <sub>80</sub> NO <sub>8</sub> P | 758.569 | 742.539,<br>802.56  | 25.2 ± 0.5  |
| 161 | 34:3 | C <sub>42</sub> H <sub>78</sub> NO <sub>8</sub> P | 756.554 | 740.524,<br>800.545 | 0.53 ± 0.01 |
| 162 | 35:1 | C <sub>43</sub> H <sub>84</sub> NO <sub>8</sub> P | 774.601 | 758.571,<br>818.592 | 0.16 ± 0.01 |
| 163 | 35:2 | C <sub>43</sub> H <sub>82</sub> NO <sub>8</sub> P | 772.585 | 756.555,<br>816.576 | 0.37 ± 0.02 |
| 164 | 36:1 | C <sub>44</sub> H <sub>86</sub> NO <sub>8</sub> P | 788.616 | 772.586,<br>832.607 | 1.46 ± 0.03 |
| 165 | 36:2 | C <sub>44</sub> H <sub>84</sub> NO <sub>8</sub> P | 786.601 | 770.571,<br>830.592 | 10.3 ± 0.2  |
| 166 | 36:3 | C <sub>44</sub> H <sub>82</sub> NO <sub>8</sub> P | 784.585 | 768.555,<br>828.576 | 6.50 ± 0.09 |
| 167 | 36:4 | C <sub>44</sub> H <sub>80</sub> NO <sub>8</sub> P | 782.569 | 766.539,<br>826.56  | 11.1 ± 0.2  |
| 168 | 36:5 | C <sub>44</sub> H <sub>78</sub> NO <sub>8</sub> P | 780.554 | 764.524,<br>824.545 | 0.50 ± 0.01 |
| 169 | 37:4 | C <sub>45</sub> H <sub>82</sub> NO <sub>8</sub> P | 796.585 | 780.555,<br>840.576 | 0.21 ± 0.02 |
| 170 | 38:3 | C <sub>46</sub> H <sub>86</sub> NO <sub>8</sub> P | 812.616 | 796.586,<br>856.607 | 2.37 ± 0.06 |
| 171 | 38:4 | C <sub>48</sub> H <sub>88</sub> NO <sub>8</sub> P | 810.601 | 794.571,<br>854.592 | 8.9 ± 0.2   |
| 172 | 38:5 | C <sub>46</sub> H <sub>82</sub> NO <sub>8</sub> P | 808.585 | 792.555,<br>852.576 | 3.0 ± 0.2   |
| 173 | 38:6 | C <sub>46</sub> H <sub>80</sub> NO <sub>8</sub> P | 806.569 | 790.539,<br>850.56  | 4.75 ± 0.14 |
| 174 | 40:4 | C <sub>48</sub> H <sub>88</sub> NO <sub>8</sub> P | 838.632 | 822.602,<br>882.623 | 0.24 ± 0.02 |
| 175 | 40:5 | C <sub>48</sub> H <sub>86</sub> NO <sub>8</sub> P | 836.616 | 820.586,<br>880.607 | 0.73 ± 0.01 |
| 176 | 40:6 | C <sub>48</sub> H <sub>84</sub> NO <sub>8</sub> P | 834.601 | 818.571,<br>878.592 | 3.92 ± 0.11 |
| 177 | 40:7 | C <sub>48</sub> H <sub>82</sub> NO <sub>8</sub> P | 832.585 | 816.555,<br>876.576 | 0.68 ± 0.03 |

Running title: All ion fragmentation as a tool for fast lipidome investigation

|                               |        |                                                                 |                        |                                                  |                     |             |
|-------------------------------|--------|-----------------------------------------------------------------|------------------------|--------------------------------------------------|---------------------|-------------|
| <b>178</b>                    | 40:8   | C <sub>48</sub> H <sub>80</sub> NO <sub>8</sub> P               | 830.569                |                                                  | 814.539,<br>874.56  | 0.14 ± 0.02 |
| <b>PC-O (14.5 – 16.0 min)</b> |        |                                                                 |                        |                                                  |                     |             |
| <b>179</b>                    | 30:0   | C <sub>38</sub> H <sub>78</sub> NO <sub>7</sub> P               |                        |                                                  | 676.529             | 1.12 ± 0.01 |
| <b>180</b>                    | 30:1   | C <sub>38</sub> H <sub>76</sub> NO <sub>7</sub> P               |                        |                                                  | 674.513             | 0.41 ± 0.01 |
| <b>181</b>                    | 32:0   | C <sub>40</sub> H <sub>82</sub> NO <sub>7</sub> P               |                        |                                                  | 704.560             | 9.3 ± 0.2   |
| <b>182</b>                    | 32:1   | C <sub>40</sub> H <sub>80</sub> NO <sub>7</sub> P               |                        |                                                  | 702.544             | 2.95 ± 0.07 |
| <b>183</b>                    | 32:2   | C <sub>40</sub> H <sub>78</sub> NO <sub>7</sub> P               |                        |                                                  | 700.529             | 0.39 ± 0.02 |
| <b>184</b>                    | 34:0   | C <sub>42</sub> H <sub>86</sub> NO <sub>7</sub> P               |                        |                                                  | 732.591             | 0.39 ± 0.03 |
| <b>185</b>                    | 34:1   | C <sub>42</sub> H <sub>84</sub> NO <sub>7</sub> P               |                        |                                                  | 730.576             | 8.0 ± 0.2   |
| <b>186</b>                    | 34:2   | C <sub>42</sub> H <sub>82</sub> NO <sub>7</sub> P               |                        |                                                  | 728.560             | 8.8 ± 0.4   |
| <b>187</b>                    | 34:3   | C <sub>42</sub> H <sub>80</sub> NO <sub>7</sub> P               |                        |                                                  | 726.544             | 4.8 ± 0.2   |
| <b>188</b>                    | 36:1   | C <sub>44</sub> H <sub>88</sub> NO <sub>7</sub> P               |                        |                                                  | 758.607             | 0.34 ± 0.03 |
| <b>189</b>                    | 36:2   | C <sub>44</sub> H <sub>86</sub> NO <sub>7</sub> P               |                        |                                                  | 756.591             | 1.44 ± 0.06 |
| <b>190</b>                    | 36:3   | C <sub>44</sub> H <sub>84</sub> NO <sub>7</sub> P               |                        |                                                  | 754.576             | 3.09 ± 0.11 |
| <b>191</b>                    | 36:4   | C <sub>44</sub> H <sub>82</sub> NO <sub>7</sub> P               | [PC-O +H] <sup>+</sup> | [PC-O -Me] <sup>-</sup>                          | 752.560             | 7.0 ± 0.2   |
| <b>192</b>                    | 36:5   | C <sub>44</sub> H <sub>80</sub> NO <sub>7</sub> P               |                        |                                                  | 750.544             | 14.8 ± 0.7  |
| <b>193</b>                    | 36:6   | C <sub>44</sub> H <sub>78</sub> NO <sub>7</sub> P               |                        |                                                  | 748.529             | 0.56 ± 0.01 |
| <b>194</b>                    | 38:3   | C <sub>46</sub> H <sub>88</sub> NO <sub>7</sub> P               |                        |                                                  | 782.607             | 0.25 ± 0.02 |
| <b>195</b>                    | 38:4   | C <sub>46</sub> H <sub>86</sub> NO <sub>7</sub> P               |                        |                                                  | 780.591             | 3.5 ± 0.2   |
| <b>196</b>                    | 38:5   | C <sub>46</sub> H <sub>84</sub> NO <sub>7</sub> P               |                        |                                                  | 778.576             | 15.2 ± 0.4  |
| <b>197</b>                    | 38:6   | C <sub>46</sub> H <sub>82</sub> NO <sub>7</sub> P               |                        |                                                  | 776.560             | 9.8 ± 0.3   |
| <b>198</b>                    | 38:7   | C <sub>46</sub> H <sub>80</sub> NO <sub>7</sub> P               |                        |                                                  | 774.544             | 4.6 ± 0.2   |
| <b>199</b>                    | 38:8   | C <sub>46</sub> H <sub>78</sub> NO <sub>7</sub> P               |                        |                                                  | 772.529             | 0.64 ± 0.06 |
| <b>200</b>                    | 40:4   | C <sub>48</sub> H <sub>90</sub> NO <sub>7</sub> P               |                        |                                                  | 808.623             | 0.30 ± 0.02 |
| <b>201</b>                    | 40:5   | C <sub>48</sub> H <sub>88</sub> NO <sub>7</sub> P               |                        |                                                  | 806.607             | 1.13 ± 0.04 |
| <b>202</b>                    | 40:10  | C <sub>48</sub> H <sub>78</sub> NO <sub>7</sub> P               |                        |                                                  | 796.529             | 0.49 ± 0.02 |
| <b>203</b>                    | 42:5   | C <sub>50</sub> H <sub>92</sub> NO <sub>7</sub> P               |                        |                                                  | 834.638             | 0.70 ± 0.03 |
| <b>SM (16.0 – 17.0 min)</b>   |        |                                                                 |                        |                                                  |                     |             |
| <b>204</b>                    | 32:1;2 | C <sub>37</sub> H <sub>75</sub> N <sub>2</sub> O <sub>6</sub> P | 675.544                | [SM -Me] <sup>-</sup><br>[SM +HCOO] <sup>-</sup> | 659.513,<br>719.534 | 5.66 ± 0.19 |
| <b>205</b>                    | 32:2;2 | C <sub>37</sub> H <sub>73</sub> N <sub>2</sub> O <sub>6</sub> P | 673.528                |                                                  | 657.498,<br>717.519 | 0.39 ± 0.01 |
| <b>206</b>                    | 33:1;2 | C <sub>38</sub> H <sub>77</sub> N <sub>2</sub> O <sub>6</sub> P | 689.559                | Intensity<br>ratio:<br>between 1<br>and 0.3      | 673.529,<br>733.550 | 1.95 ± 0.03 |
| <b>207</b>                    | 34:0;2 | C <sub>39</sub> H <sub>81</sub> N <sub>2</sub> O <sub>6</sub> P | 705.591                |                                                  | 689.56,<br>749.581  | 1.7 ± 0.3   |

Running title: All ion fragmentation as a tool for fast lipidome investigation

|                            |        |                                                                 |                       |         |                                                    |                     |             |
|----------------------------|--------|-----------------------------------------------------------------|-----------------------|---------|----------------------------------------------------|---------------------|-------------|
| <b>208</b>                 | 34:1;2 | C <sub>39</sub> H <sub>79</sub> N <sub>2</sub> O <sub>6</sub> P |                       | 703.575 |                                                    | 687.545,<br>747.566 | 46.2 ± 0.3  |
| <b>209</b>                 | 34:2;2 | C <sub>39</sub> H <sub>77</sub> N <sub>2</sub> O <sub>6</sub> P |                       | 701.559 |                                                    | 685.529,<br>745.550 | 6.95 ± 0.07 |
| <b>210</b>                 | 35:1;2 | C <sub>40</sub> H <sub>81</sub> N <sub>2</sub> O <sub>6</sub> P |                       | 717.591 |                                                    | 701.560,<br>761.581 | 1.00 ± 0.01 |
| <b>211</b>                 | 36:0;2 | C <sub>41</sub> H <sub>85</sub> N <sub>2</sub> O <sub>6</sub> P |                       | 733.622 |                                                    | 717.592,<br>777.613 | 0.36 ± 0.05 |
| <b>212</b>                 | 36:1;2 | C <sub>41</sub> H <sub>83</sub> N <sub>2</sub> O <sub>6</sub> P |                       | 731.606 |                                                    | 715.576,<br>775.597 | 7.82 ± 0.08 |
| <b>213</b>                 | 36:2;2 | C <sub>41</sub> H <sub>81</sub> N <sub>2</sub> O <sub>6</sub> P |                       | 729.591 |                                                    | 713.560,<br>773.581 | 4.22 ± 0.08 |
| <b>214</b>                 | 37:1;2 | C <sub>42</sub> H <sub>85</sub> N <sub>2</sub> O <sub>6</sub> P |                       | 745.622 |                                                    | 729.592,<br>789.613 | 0.4 ± 0.01  |
| <b>215</b>                 | 38:0;2 | C <sub>43</sub> H <sub>89</sub> N <sub>2</sub> O <sub>6</sub> P |                       | 761.653 |                                                    | 745.623,<br>805.644 | 0.19 ± 0.01 |
| <b>216</b>                 | 38:1;2 | C <sub>43</sub> H <sub>87</sub> N <sub>2</sub> O <sub>6</sub> P |                       | 759.637 |                                                    | 743.607,<br>803.628 | 3.05 ± 0.04 |
| <b>217</b>                 | 38:2;2 | C <sub>43</sub> H <sub>85</sub> N <sub>2</sub> O <sub>6</sub> P |                       | 757.622 |                                                    | 741.592,<br>801.613 | 1.33 ± 0.04 |
| <b>218</b>                 | 39:1;2 | C <sub>44</sub> H <sub>89</sub> N <sub>2</sub> O <sub>6</sub> P |                       | 773.653 |                                                    | 757.623,<br>817.644 | 0.65 ± 0.01 |
| <b>219</b>                 | 40:1;2 | C <sub>45</sub> H <sub>91</sub> N <sub>2</sub> O <sub>6</sub> P |                       | 787.669 |                                                    | 771.639,<br>831.660 | 3.46 ± 0.10 |
| <b>220</b>                 | 40:2;2 | C <sub>45</sub> H <sub>89</sub> N <sub>2</sub> O <sub>6</sub> P |                       | 785.653 |                                                    | 769.623,<br>829.644 | 2.55 ± 0.07 |
| <b>221</b>                 | 41:1;2 | C <sub>46</sub> H <sub>93</sub> N <sub>2</sub> O <sub>6</sub> P |                       | 801.684 |                                                    | 785.654,<br>845.675 | 1.08 ± 0.02 |
| <b>222</b>                 | 41:2;2 | C <sub>46</sub> H <sub>91</sub> N <sub>2</sub> O <sub>6</sub> P |                       | 799.669 |                                                    | 783.639,<br>843.660 | 0.97 ± 0.01 |
| <b>223</b>                 | 42:1;2 | C <sub>47</sub> H <sub>95</sub> N <sub>2</sub> O <sub>6</sub> P |                       | 815.700 |                                                    | 799.670,<br>859.691 | 2.87 ± 0.01 |
| <b>224</b>                 | 42:2;2 | C <sub>47</sub> H <sub>93</sub> N <sub>2</sub> O <sub>6</sub> P |                       | 813.684 |                                                    | 797.654,<br>857.675 | 7.24 ± 0.15 |
| <b>LPC (17 – 18.0 min)</b> |        |                                                                 |                       |         |                                                    |                     |             |
| <b>225</b>                 | 15:0   | C <sub>23</sub> H <sub>48</sub> NO <sub>7</sub> P               | [LPC +H] <sup>+</sup> | 482.324 | [LPC -Me] <sup>-</sup><br>[LPC +HCOO] <sup>-</sup> | 466.294,<br>526.315 | 0.24 ± 0.01 |
| <b>226</b>                 | 16:0   | C <sub>24</sub> H <sub>50</sub> NO <sub>7</sub> P               |                       | 496.340 |                                                    | 480.31,<br>540.331  | 41.3 ± 0.5  |

Running title: All ion fragmentation as a tool for fast lipidome investigation

|            |      |                                                   |         |                                          |                     |             |
|------------|------|---------------------------------------------------|---------|------------------------------------------|---------------------|-------------|
| <b>227</b> | 16:1 | C <sub>24</sub> H <sub>48</sub> NO <sub>7</sub> P | 494.324 | Intensity ratio:<br>between 1<br>and 0.4 | 478.294,<br>538.315 | 0.79 ± 0.03 |
| <b>228</b> | 17:0 | C <sub>25</sub> H <sub>52</sub> NO <sub>7</sub> P | 510.355 |                                          | 494.325,<br>554.346 | 1.07 ± 0.01 |
| <b>229</b> | 18:0 | C <sub>26</sub> H <sub>54</sub> NO <sub>7</sub> P | 524.371 |                                          | 508.341,<br>568.362 | 21.6 ± 0.4  |
| <b>230</b> | 18:1 | C <sub>26</sub> H <sub>52</sub> NO <sub>7</sub> P | 522.355 |                                          | 506.325,<br>566.346 | 13.3 ± 0.2  |
| <b>231</b> | 18:2 | C <sub>26</sub> H <sub>50</sub> NO <sub>7</sub> P | 520.340 |                                          | 504.31,<br>564.331  | 13.1 ± 0.2  |
| <b>232</b> | 18:3 | C <sub>26</sub> H <sub>48</sub> NO <sub>7</sub> P | 518.324 |                                          | 502.294,<br>562.315 | 0.18 ± 0.01 |
| <b>233</b> | 20:1 | C <sub>28</sub> H <sub>56</sub> NO <sub>7</sub> P | 550.387 |                                          | 534.357,<br>594.378 | 0.15 ± 0.01 |
| <b>234</b> | 20:2 | C <sub>28</sub> H <sub>54</sub> NO <sub>7</sub> P | 548.371 |                                          | 532.341,<br>592.362 | 0.14 ± 0.01 |
| <b>235</b> | 20:3 | C <sub>28</sub> H <sub>52</sub> NO <sub>7</sub> P | 546.355 |                                          | 530.325,<br>590.346 | 2.04 ± 0.04 |
| <b>236</b> | 20:4 | C <sub>28</sub> H <sub>50</sub> NO <sub>7</sub> P | 544.340 |                                          | 528.31,<br>588.331  | 4.43 ± 0.05 |
| <b>237</b> | 20:5 | C <sub>28</sub> H <sub>48</sub> NO <sub>7</sub> P | 542.324 |                                          | 526.294,<br>586.315 | 0.25 ± 0.01 |
| <b>238</b> | 22:5 | C <sub>30</sub> H <sub>52</sub> NO <sub>7</sub> P | 570.355 |                                          | 554.325,<br>614.346 | 0.23 ± 0.01 |
| <b>239</b> | 22:6 | C <sub>30</sub> H <sub>50</sub> NO <sub>7</sub> P | 568.340 |                                          | 552.310,<br>612.331 | 1.16 ± 0.04 |

LPC-O (17 – 18.0 min)

|            |      |                                                   |                         |                          |         |             |
|------------|------|---------------------------------------------------|-------------------------|--------------------------|---------|-------------|
| <b>240</b> | 16:1 | C <sub>24</sub> H <sub>50</sub> NO <sub>6</sub> P |                         |                          | 464.315 | 35.8 ± 0.3  |
| <b>241</b> | 18:0 | C <sub>26</sub> H <sub>56</sub> NO <sub>6</sub> P |                         |                          | 494.362 | 11.3 ± 0.2  |
| <b>242</b> | 18:1 | C <sub>26</sub> H <sub>54</sub> NO <sub>6</sub> P |                         |                          | 492.346 | 25.9 ± 0.2  |
| <b>243</b> | 18:2 | C <sub>26</sub> H <sub>52</sub> NO <sub>6</sub> P |                         |                          | 490.330 | 3.2 ± 0.2   |
| <b>244</b> | 20:0 | C <sub>28</sub> H <sub>60</sub> NO <sub>6</sub> P |                         |                          | 522.393 | 2.5 ± 0.2   |
| <b>245</b> | 20:1 | C <sub>28</sub> H <sub>58</sub> NO <sub>6</sub> P | [LPC-O +H] <sup>+</sup> | [LPC-O -Me] <sup>-</sup> | 520.377 | 2.0 ± 0.2   |
| <b>246</b> | 20:2 | C <sub>28</sub> H <sub>56</sub> NO <sub>6</sub> P |                         |                          | 518.362 | 0.31 ± 0.05 |
| <b>247</b> | 22:0 | C <sub>60</sub> H <sub>64</sub> NO <sub>6</sub> P |                         |                          | 550.424 | 4.0 ± 0.2   |
| <b>248</b> | 22:1 | C <sub>60</sub> H <sub>62</sub> NO <sub>6</sub> P |                         |                          | 548.409 | 3.38 ± 0.02 |
| <b>249</b> | 22:2 | C <sub>30</sub> H <sub>60</sub> NO <sub>6</sub> P |                         |                          | 546.393 | 0.43 ± 0.02 |
| <b>250</b> | 23:0 | C <sub>31</sub> H <sub>66</sub> NO <sub>6</sub> P |                         |                          | 564.440 | 0.40 ± 0.03 |
| <b>251</b> | 24:1 | C <sub>32</sub> H <sub>66</sub> NO <sub>6</sub> P |                         |                          | 576.440 | 9.0 ± 0.3   |

Running title: All ion fragmentation as a tool for fast lipidome investigation

|            |      |                                                   |  |  |         |             |
|------------|------|---------------------------------------------------|--|--|---------|-------------|
| <b>252</b> | 24:2 | C <sub>32</sub> H <sub>64</sub> NO <sub>6</sub> P |  |  | 574.424 | 1.53 ± 0    |
| <b>253</b> | 26:2 | C <sub>34</sub> H <sub>68</sub> NO <sub>6</sub> P |  |  | 602.455 | 0.47 ± 0.02 |

Running title:

**Table S2.** Summary of sphingoid base signals found for SM and Hex<sub>2</sub>Cer of plasma samples. Data are reported in relative terms (%). Mean values and standard deviations obtained from three replicates are reported.

| <b>C18 sphingosine (<i>m/z</i> 264)</b> |           | <b>Sphingadiene (<i>m/z</i> 262)</b> |            | <b>C16 sphingosine (<i>m/z</i> 236)</b> |           |
|-----------------------------------------|-----------|--------------------------------------|------------|-----------------------------------------|-----------|
| <b>Hex2Cer</b>                          | <b>SM</b> | <b>Hex2Cer</b>                       | <b>SM</b>  | <b>Hex2Cer</b>                          | <b>SM</b> |
| 47 ± 1                                  | 30 ± 1    | 5.5 ± 0.7                            | 10.0 ± 0.4 | 2.2 ± 0.2                               | 4.7 ± 0.3 |

Running title:

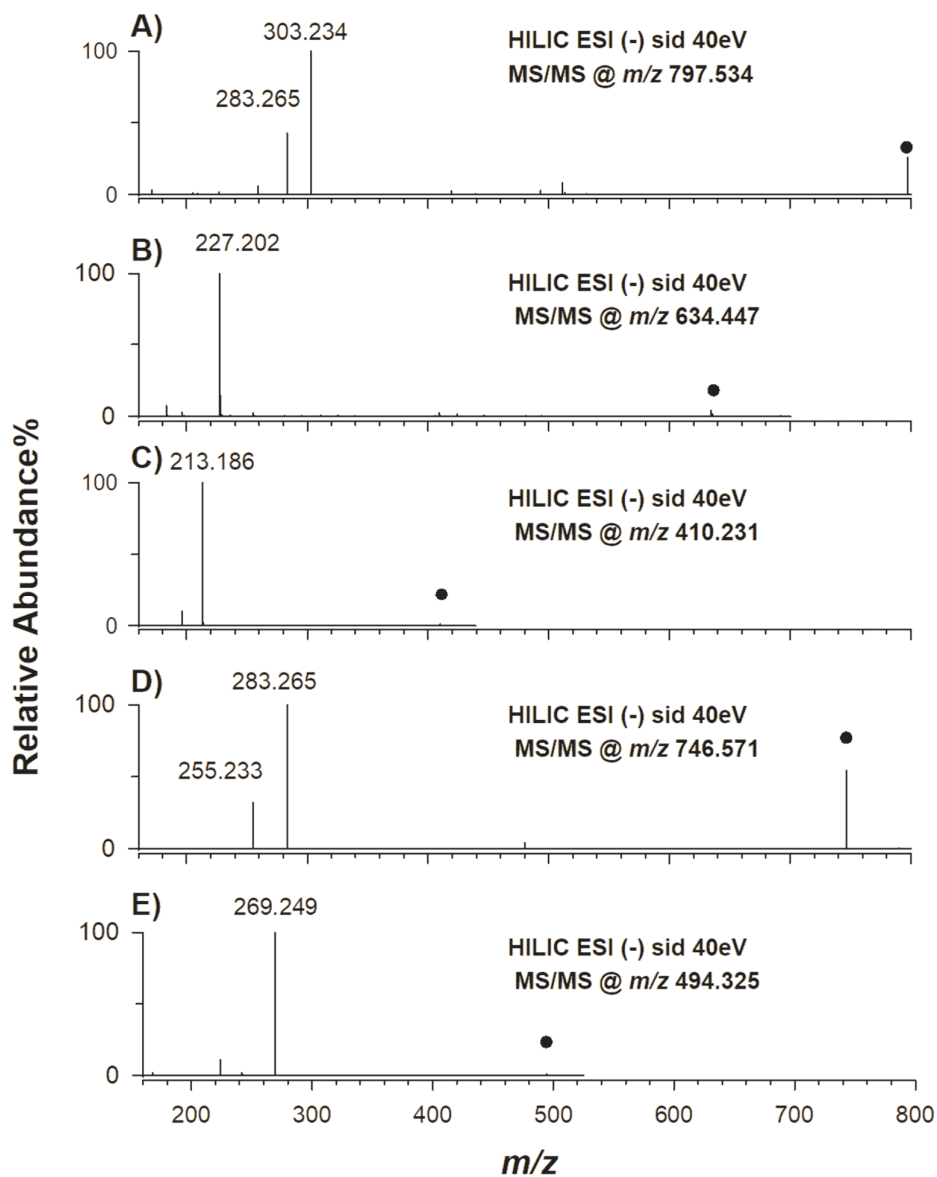

**Figure S1.** ESI-MS/MS (normalized collisional energy used: 30%) spectra related to standard phospholipids referred to A) PG 18:0/20:4 at  $m/z$  797.534, B) PE 14:0/14:0 at  $m/z$  634.447, C) LPE 13:0/0:0 at  $m/z$  410.231, D) PC 16:0/18:0 at  $m/z$  746.571 and E) LPC 17:0/0:0 at  $m/z$  494.325. Precursor ions in A-C were isolated as deprotonated molecules  $[M-H]^-$ , while precursors in D and E were isolated as demethylated ion  $[M-CH_3]^-$ . Molecular structures for standard PL are reported in Figure 1.



Running title:

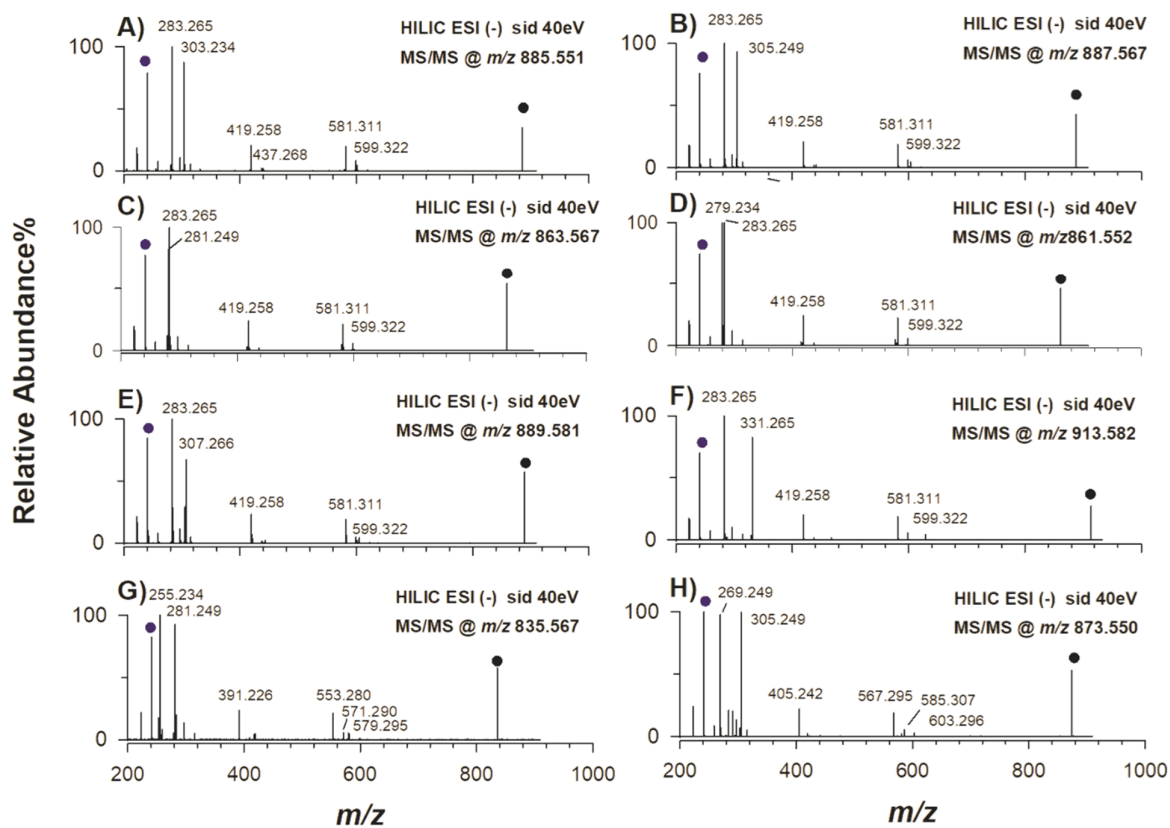

**Figure S2.** FT MS/MS spectra obtained in negative ion mode on deprotonated species of the main PI found in bovine liver standard extract : A) PI 18:0/20:4 at  $m/z$  885.551, B) PI 18:0/20:3 at  $m/z$  887.567, C) PI 18:0/18:1 at  $m/z$  863.567, D) PI 18:0/18:2 at  $m/z$  861.552, E) PI 18:0/20:2 at  $m/z$  889.581, F) PI 18:0/22:4 at  $m/z$  913.582, G) PI 16:0/18:1 at  $m/z$  835.567, H) PI 17:0/20:3 at  $m/z$  873.550.

Running title:

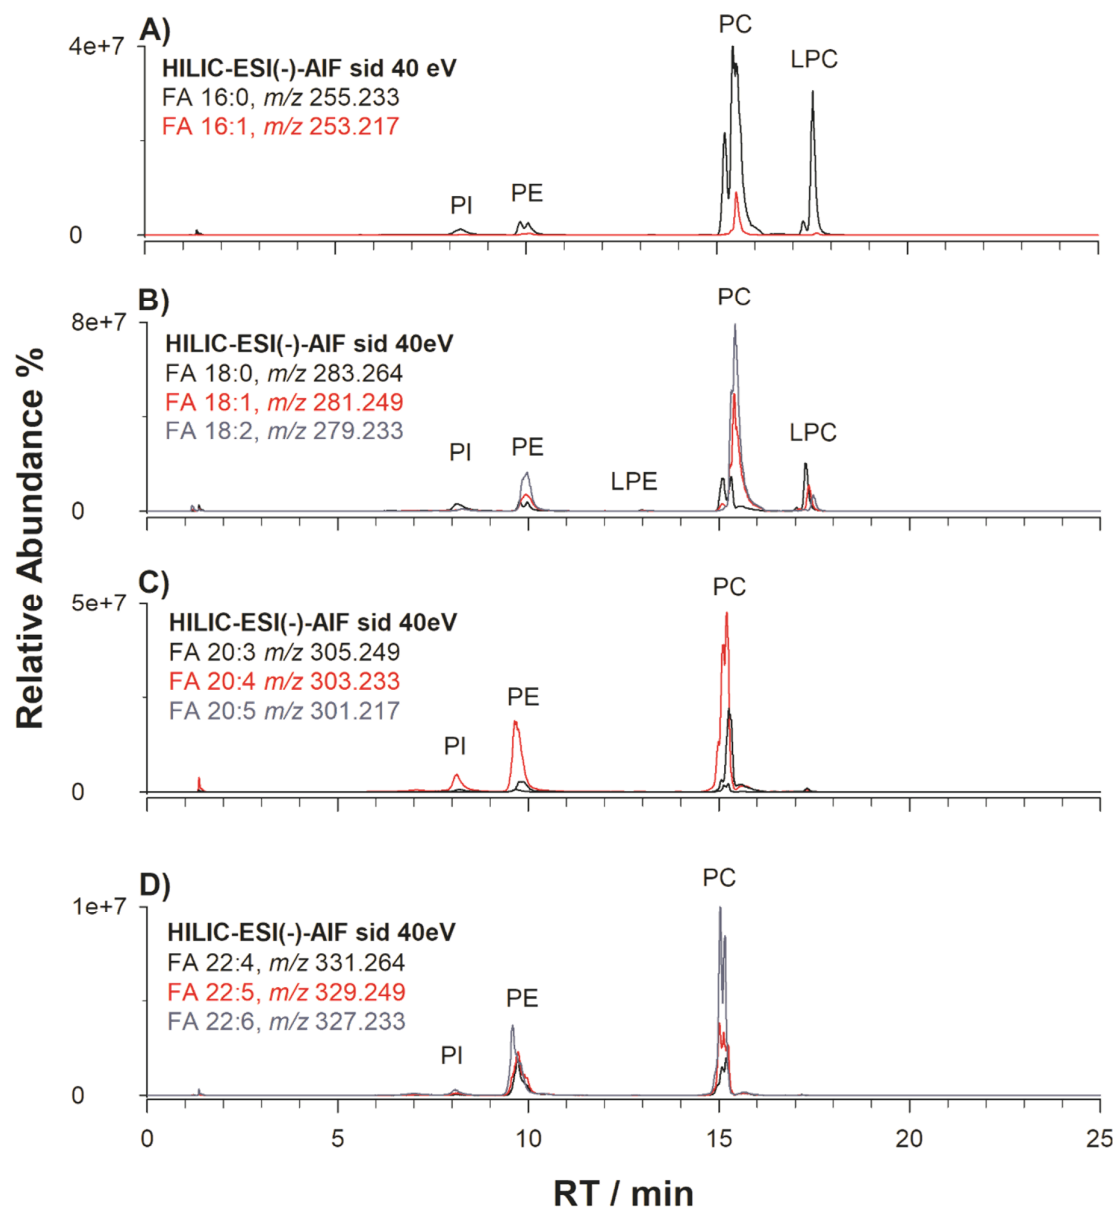

**Figure S3.** Extracted ion current chromatograms (XIC) obtained upon HILIC-ESI-FTMS analysis of a plasma sample using all ion fragmentation (AIF). XIC chromatograms were obtained using narrow windows centred on selected  $m/z$  values corresponding to those of the most interesting carboxylate ions in the different lipid classes (see Table 2).

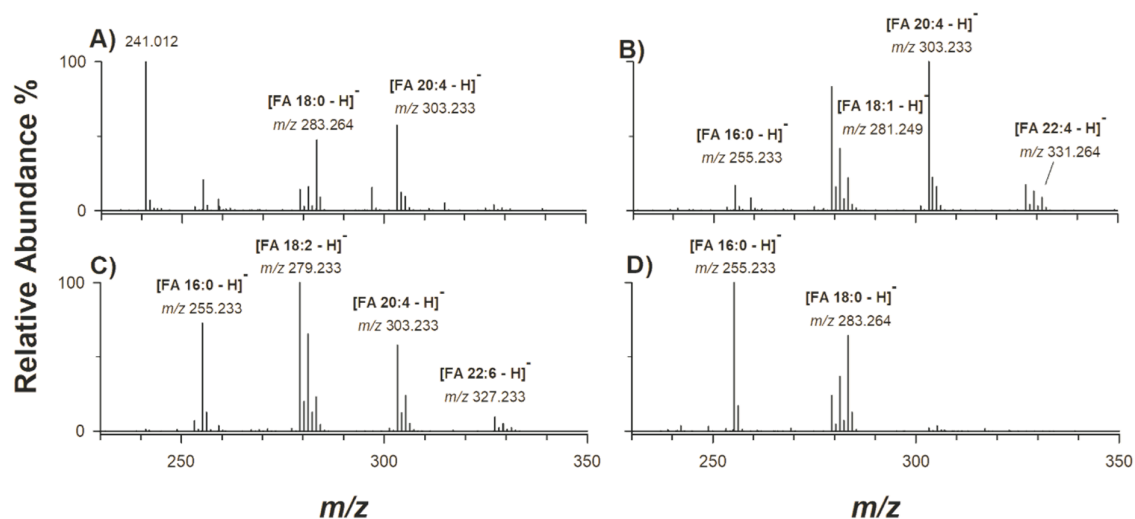

**Figure S4.** AIF MS spectra averaged under the HILIC bands related to the PL classes of PI (A), PE (B), PC (C) and LPC (D), as obtained upon HILIC-ESI(-)-FTMS analysis of a plasma lipid extract.

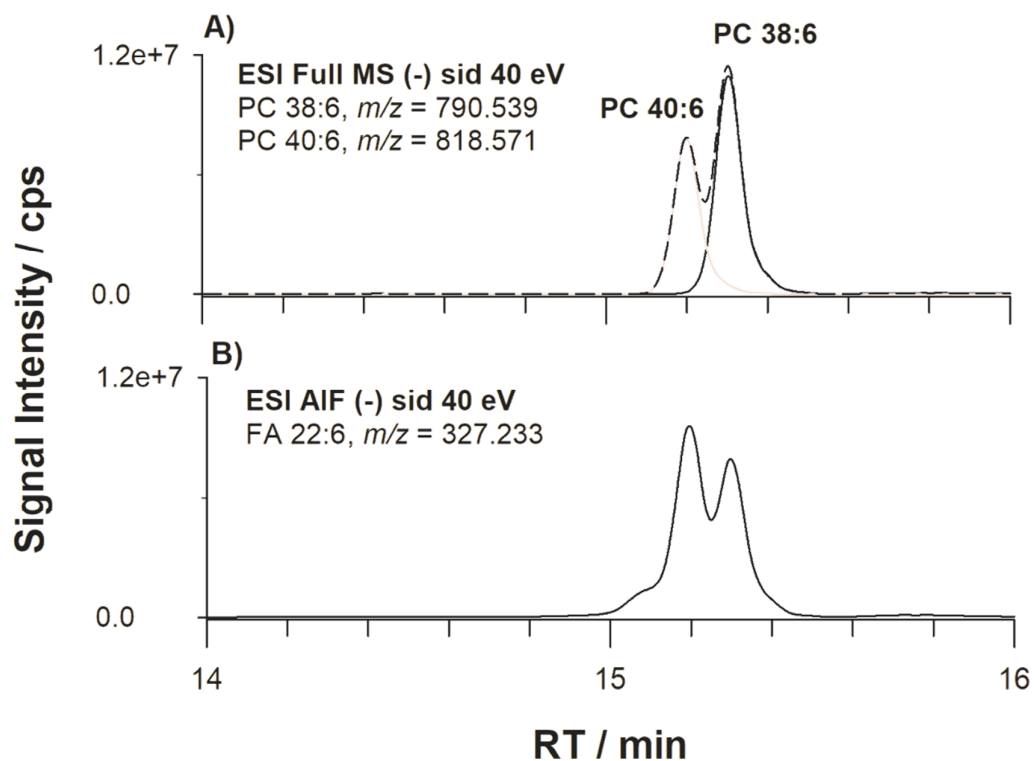

**Figure S5.** Extracted ion current chromatograms referred to: (A) the carboxylate ion of FA 22:6, and (B) the negative ions related to PC 40:6 and PC 38:6, obtained upon HILIC-ESI(-)-FTMS analysis of a plasma extract with AIF MS and Full MS acquisition, respectively. Note that Source Induced Fragmentation (sid) at an energy of 40 eV was applied in both cases.

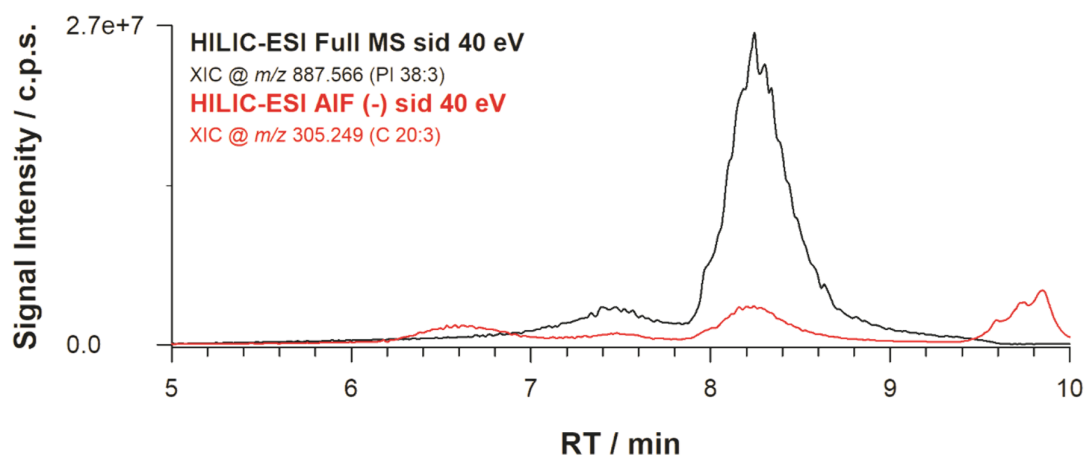

**Figure S6:** Superimposition of XIC traces referred to PI 38:3 and to the carboxylate of FA 20:3, obtained using Full MS and AIF MS acquisition modes, respectively, during the HPLC-ESI(-)-FTMS analysis of the lipid extract of human dermal fibroblasts.
